# Supplementary material
Source: PubMed Central journal article supplement (PMC11005918)
Supplement: NIHMS1981981-supplement-Supplementary_Material_and_figures.pdf [file NIHMS1981981-supplement-Supplementary_Material_and_figures.pdf]

## **SUPPLEMENTARY INFORMATION**

### **Monoclonal FoxO1 reporter cell lines**

Various FoxO1 promoter sequences (Supplementary Figure 6A) ranging from 0.5 kb to 4.4 kb (Supplementary Figure 6B) were inserted to pGL4.16 [Luc2CP/Hygro] plasmid (Promega) which encodes the luciferase reporter gene luc2CP. This vector also contains a mammalian selectable marker for hygromycin resistance.

SW1353 chondrosarcoma cells were transfected with the plasmids containing FoxO1 promoter sequences using Lipofectamine 3000 (Invitrogen) and incubated with 400 µg/ml hygromycin to select only transfected cells. Some of the constructs contained the binding site of LXR $\alpha$  activator and we thus tested T0901317(TO9) (Sigma), a potent and selective agonist for both LXR $\alpha$  and LXR $\beta$ , with a half maximal effective concentration (EC<sub>50</sub>) of about 50 nM<sup>[1, 2]</sup>. 5 -aminoimidazole -4 -carboxamide -1- $\beta$ -d-ribofuranoside (AICAR)<sup>[2]</sup>, and LY 294002, a PI3 kinase inhibitor (Cell Signaling) were also tested as they have been reported to induce FoxO1 mRNA expression. Cells were treated with these compounds for 24 hours, and luciferase activity was measured using Dual-Luciferase Reporter Assay System (Promega). Among the FoxO1 promoter constructs, the 0.8 kb or 1.6 kb constructs showed the highest luciferase activities of all the constructs. We thus prepared monoclonal SW1353 cell lines with the 0.8 kb or 1.6 kb FoxO1 promoter luciferase constructs by serial dilution methods, and then we compared the luciferase activity between the top 2 clones (Supplementary Figure 6B). Clone FoxO1 0.8-3 showed the largest increase in luciferase activity and was selected for use in the high throughput drug screening (HTS) ( Supplementary Figure 6C).

### **High throughput drug screening with ReFRAME library**

To find compounds that upregulate FoxO1 expression for OA treatment, we used the Repurposing, Focused Rescue, and Accelerated Medchem (ReFRAME) Library for HTS. The ReFRAME library is composed of 11,948 small molecules that have reached clinical development or undergone significant preclinical profiling<sup>[3]</sup>. The drugs were pre-spotted into 1536-well assay plates with the Echo Acoustic Liquid Handler (Beckman) to achieve a final concentration of 5 µM in an 8 µL/well final assay volume. The monoclonal SW1353 cell line containing the FoxO1 0.8 kb promoter-luciferase construct was dispensed into the assay plates with 100 cells per well. Cells were allowed to grow for 24 h at 37°C with

5% CO<sub>2</sub> in a humidified tissue culture incubator. Luciferase activities were measured using Steady Glo (Promega) according to the manufacturer's instruction. The hit compounds were replated for confirmation assays first in triplicate and then evaluated in a 10-point dose-response concentration curve. EC<sub>50</sub> were calculated from the dose-response curve, and the hit compounds were ranked from the lowest to highest EC<sub>50</sub>.

### **In vitro experiments with human chondrocytes, synoviocytes and meniscus cells**

Human primary OA chondrocytes, synoviocytes and meniscus cells were isolated from patients undergoing total knee arthroplasty and cultured as previously described<sup>[4],[5]</sup>. First passage cells were used for experiments. Normal human chondrocytes were isolated from normal human knee joints which were obtained from tissue banks and maintained in the same way. In all in vitro experiments, SW1353 human chondrosarcoma cells were plated at 5×10<sup>3</sup> cells/mL and human primary cells were plated at 1×10<sup>4</sup> cells/mL. In experiments where drugs were diluted with DMSO, the DMSO concentration in the culture medium was always adjusted to 0.1%.

### **Validation of selected hit compounds using SW1353, OA and normal human chondrocytes**

To validate and compare the effect of hit compounds from the ReFRAME screen, compounds with suitable EC<sub>50</sub> and biological properties that suggest potential benefit in OA were selected and tested in SW1353 cells, OA and normal chondrocytes. Cells were seeded in 96 well plates, cultured for 24 h, incubated with the selected compounds at 0.1×, 1× and 10× EC<sub>50</sub> for SW1353 cells and at 1×, 5× and 10× EC<sub>50</sub> for chondrocytes for 24 h, and then mRNA was extracted for RT-qPCR.

### **Dose effects of Panobinostat on cell viability and gene expression human chondrocytes, synoviocytes and meniscus cells with and without IL-1β stimulation**

For cell viability experiments, OA chondrocytes precultured for 24 h and then incubated with various doses of Panobinostat for 24 h and cell viability was tested with CellTiter-Glo (Promega) according to the manufacturer's instruction.

To examine dose-dependent effects of Panobinostat on gene expression, OA chondrocytes, synovial cells, and meniscus cells were pre-cultured for 24 h and then incubated with various doses of Panobinostat for another 24 h with and without IL-1β (1 ng/ml) for additional 6 h.

### **Chondrocyte Treatment with FoxO1 inhibitor AS1842856.**

To test which Panobinostat effects were dependent on FoxO1, chondrocytes were treated with Panobinostat (80 nM) in the presence or absence of the specific FoxO1 inhibitor AS1842856<sup>[6]</sup> (Sigma-Aldrich 344355; 0.1  $\mu$ M) for 24 hours and RNA was isolated for qRT-PCR analysis.

### **RNA isolation and RT-qPCR**

In cultured cells, mRNA was collected using Direct-Zol RNA miniprep kit (Zymo Research).

Gene expression was measured by RT-qPCR using pre-designed TaqMan gene expression assays.

GAPDH was measured as a reference gene.

### **Mice**

All animal experiments were performed in compliance with protocols approved by the Institutional Animal Care and Use Committee at Scripps Research. Mice from the C57BL/6J strain were used in all experiments.

### **Short-term effect of Panobinostat in vivo on normal mouse knee cartilage and IL-1 $\beta$ induced inflammation**

To determine the short-term effects of Panobinostat on mouse knee cartilage without experimental OA, C57BL/6J mice (all male mice, age 4 months) received 3 intraperitoneal injections every other day of 100  $\mu$ g/kg or 2.5 mg/kg of Panobinostat or DMSO vehicle (0.1%). Knee cartilage was collected 1 to 3 h after the final injection for RNA isolation.

We next investigated the in vivo effect of Panobinostat on IL-1 $\beta$  induced inflammation. Two hours after intraperitoneal injection of 2.5 mg/kg of Panobinostat or DMSO vehicle, 5 ng of IL-1 $\beta$  was injected into the right knee and the left knee was untreated as control knee. Total RNA of knee cartilage and synovium was collected 6 h after the IL-1 $\beta$  injection. The RT-qPCR values of right knee were normalized with left knee in each mouse, and we compared the average values between the vehicle-treated control group and the Panobinostat-treated group.

### **Panobinostat treatment of mice with surgically induced OA**

For the surgical OA model, 4-month-old male C57BL/6J mice (n=14 per group) were anesthetized and transection of the medial meniscotibial ligament (DMM) was performed in the right knee as described<sup>[7]</sup>.

<sup>8</sup>. To serve as control, sham surgery was performed on the left knee and consisted of a small incision on the medial side and opening of the joint capsule and closing with surgical suture. Animals were euthanized 8 weeks or 12 weeks after surgery, and knee joints were embedded in a standardized fixed angle of the femur relative to the tibia so that the sections that were scored represent the center of the weight-bearing areas of the tibial plateau and femoral condyle<sup>[9]</sup>. Five- $\mu$ m thick sagittal sections of the medial compartment of the knee were stained with Safranin-O and fast green<sup>[9]</sup>, and OA related changes were scored as previously described for articular cartilage (summed OARSI score for femur and tibia)<sup>[10]</sup>, synovium<sup>[11]</sup>, and subchondral bone<sup>[12]</sup>. Samples were graded by two different individuals blinded to the treatment. In the first experiment, we assigned three treatment groups, DMSO vehicle-treated group, 100 mg/kg and 2.5 mg/kg Panobinostat-treated groups. Panobinostat or vehicle were administrated intraperitoneally 3 times per week for 7 weeks, starting 1 week after the surgery. In the second experiment, we assigned two treatment groups, DMSO vehicle-treated group and 1 mg/kg Panobinostat-treated groups. Panobinostat or vehicle were administrated intraperitoneally 3 times per week for 11 weeks, starting 1 week after the surgery.

### **Measurements of knee swelling in mice**

The lateral diameter of the knee that underwent DMM surgery was measured by caliper before the surgery and 1-9 days after the surgery, and the difference between vehicle-treated and Panobinostat-treated groups was calculated.

### **Pain measurements in mice**

The von Frey assay for evaluating mechanical allodynia was conducted at 4 weeks and 8 weeks after DMM surgery<sup>[13]</sup>. Mice were placed on a mesh metal platform and the plantar surface of the hind paw was touched with #4 (1 g) and #5 (2 g) von Frey filaments 5 times for each hind paw since we could not observe paw withdrawal by less than #4 filaments. The number of paw withdrawals out of 5 repetitions were counted.

### **Statistical analysis**

Data are reported as the mean  $\pm$  SD. Multiple group analysis was assessed by one-way analysis of variance (ANOVA) followed by a post-hoc Tukey test. Comparisons between two groups were assessed by an unpaired, two-tailed T-test after testing for equal variance using an F-test. All statistical analyses

were performed using Prism 6 software (GraphPad Software). P-values less than 0.05 were considered significant.

## **SUPPLEMENTAL FIGURE LEGENDS**

**Supplementary Figure 1.** Dose response analysis of selected HDACi in counter-screen.

**Supplementary Figure 2.** Cell viability of chondrocytes after treatment with Panobinostat.

**Supplementary Figure 3.** Effects of FOXO1 inhibition on Panobinostat treatment.

Human normal healthy chondrocytes (passage 1 from 7 donors) were incubated with Panobinostat (80 nM) in the presence or absence of the specific FOXO1 inhibitor AS1842856 (0.1  $\mu$ M) for 24 hours and RNA was isolated for qRT-PCR analysis.

\*\*\*\*=  $p < 0.0001$ ; \*\*\*=  $p < 0.001$ ; \*\*=  $p < 0.01$ ; \*=  $p < 0.05$ .

**Supplementary Figure 4.** Knee swelling of mice that were subjected to DMM.

**Supplementary Figure 5.** Von Frey testing for evaluating mechanical allodynia was performed with 2 g filaments at the indicated time points after DMM in the 8-week and 12-week Panobinostat treatment experiments.

**Supplementary Figure 6. FoxO1 reporter constructs.** (A) FoxO1 promoter. (B) Various FoxO1 promoter sequences ranging from 0.5 kb to 4.4 kb were inserted to pGL4.16 [Luc2CP/Hygro] plasmid (Promega) which encodes the luciferase reporter gene luc2CP.

## REFERENCES

1. Repa JJ, Turley SD, Lobaccaro JA, Medina J, Li L, Lustig K, et al. Regulation of absorption and ABC1-mediated efflux of cholesterol by RXR heterodimers. *Science* 2000; 289: 1524-1529.
2. Deng X, Zhang W, I OS, Williams JB, Dong Q, Park EA, et al. FoxO1 inhibits sterol regulatory element-binding protein-1c (SREBP-1c) gene expression via transcription factors Sp1 and SREBP-1c. *J Biol Chem* 2012; 287: 20132-20143.
3. Janes J, Young ME, Chen E, Rogers NH, Burgstaller-Muehlbacher S, Hughes LD, et al. The ReFRAME library as a comprehensive drug repurposing library and its application to the treatment of cryptosporidiosis. *Proc Natl Acad Sci U S A* 2018; 115: 10750-10755.
4. Kjaer SK, de Villiers EM, Haugaard BJ, Christensen RB, Teisen C, Moller KA, et al. Human papillomavirus, herpes simplex virus and cervical cancer incidence in Greenland and Denmark. A population-based cross-sectional study. *Int J Cancer* 1988; 41: 518-524.
5. Alvarez-Garcia O, Matsuzaki T, Olmer M, Plate L, Kelly JW, Lotz MK. Regulated in Development and DNA Damage Response 1 Deficiency Impairs Autophagy and Mitochondrial Biogenesis in Articular Cartilage and Increases the Severity of Experimental Osteoarthritis. *Arthritis Rheumatol* 2017; 69: 1418-1428.
6. Liu L, Zheng LD, Zou P, Brooke J, Smith C, Long YC, et al. FoxO1 antagonist suppresses autophagy and lipid droplet growth in adipocytes. *Cell Cycle* 2016; 15: 2033-2041.
7. Carames B, Hasegawa A, Taniguchi N, Miyaki S, Blanco FJ, Lotz M. Autophagy activation by rapamycin reduces severity of experimental osteoarthritis. *Ann Rheum Dis* 2012; 71: 575-581.
8. Glasson SS, Blanchet TJ, Morris EA. The surgical destabilization of the medial meniscus (DMM) model of osteoarthritis in the 129/SvEv mouse. *Osteoarthritis Cartilage* 2007; 15: 1061-1069.
9. Akasaki Y, Hasegawa A, Saito M, Asahara H, Iwamoto Y, Lotz MK. Dysregulated FOXO transcription factors in articular cartilage in aging and osteoarthritis. *Osteoarthritis Cartilage* 2014; 22: 162-170.
10. Glasson SS, Chambers MG, Van Den Berg WB, Little CB. The OARSI histopathology initiative - recommendations for histological assessments of osteoarthritis in the mouse. *Osteoarthritis Cartilage* 2010; 18 Suppl 3: S17-23.

11. Krenn V, Morawietz L, Haupl T, Neidel J, Petersen I, Konig A. Grading of chronic synovitis--a histopathological grading system for molecular and diagnostic pathology. *Pathol Res Pract* 2002; 198: 317-325.
12. Nagira K, Ikuta Y, Shinohara M, Sanada Y, Omoto T, Kanaya H, et al. Histological scoring system for subchondral bone changes in murine models of joint aging and osteoarthritis. *Sci Rep* 2020; 10: 10077.
13. Chaplan SR, Bach FW, Pogrel JW, Chung JM, Yaksh TL. Quantitative assessment of tactile allodynia in the rat paw. *J Neurosci Methods* 1994; 53: 55-63.

## Suppl Table 1. Non-hit HDACI

|                                 |
|---------------------------------|
| ISOVALERAMIDE                   |
| Mocetinostat                    |
| Ricolinostat                    |
| Resminostat (RAS2410)           |
| Entinostat (MS-275)             |
| Romidepsin                      |
| Sodium Phenylbutyrate (AMX0035) |
| VALPROIC ACID                   |
| Pivanex (AN-9)                  |
| R306465                         |
| CRA-026440                      |
| Nanatinostat (CHR-3996)         |
| Chidamide                       |
| GLYCEROL PHENYLBUTYRATE         |
| 4SC-202                         |
| RG2833                          |
| Remetinostat                    |
| Fimepinostat (CUDC-907)         |
| Dihydrocoumarin                 |
| MGCD-290                        |
| EVP-0334                        |
| ARGININE BUTYRATE               |
| Tinostamustine (EDO-S101)       |
| Citarinostat                    |



## Suppl Table 2. Characteristics of hit and non-hit HDACI.

|         |                         |                                                                                                                                     |
|---------|-------------------------|-------------------------------------------------------------------------------------------------------------------------------------|
| Hit     | Hydroxamic acids        | Panobinostat, Vorinostat, CUDC-101, Quisinostat, Pracinostat, Abexinostat, Givinostat, Belinostat, CHR-3996, Resminostat, Scriptaid |
|         | Benzamides              | Tacedinaline                                                                                                                        |
| Non-hit | Hydroxamic acids        | Ricolinostat, Ivaltinostat, Remetinostat                                                                                            |
|         | Short-chain fatty acids | Sodium phenylbutyrate, Valproic acid, Pivanex                                                                                       |
|         | Benzamides              | Mocetinostat, Entinostat, 4SC202                                                                                                    |
|         | Cyclic tetrapeptides    | Romidepsin                                                                                                                          |

**Suppl Table 3. Classes and IC<sub>50</sub> of hit and non-hit HDACI.**

|                | Compound     | HDAC isoform, IC <sub>50</sub> (nM) |          |      |            |            |            |            |           |            |  |
|----------------|--------------|-------------------------------------|----------|------|------------|------------|------------|------------|-----------|------------|--|
|                |              | 1                                   | 2        | 3    | 8          | 4          | 5          | 7          | 9         | 6          |  |
| <b>Hit</b>     | Panobinostat | 3                                   | 2        | 2    | 22         | 1          | 1          | 2          | 1         | 1          |  |
|                | Vorinostat   | 60                                  | 42       | 36   | 173        | 20         | 36         | 129        | 49        | 29         |  |
|                | Quisinostat  | 0.1                                 | 0.3      | 5    | 4          | 0.6        | 4          | 119        | 32        | 77         |  |
|                | Pracinostat  | 28                                  | 27       | 19   | 48         | 16         | 21         | 104        | 24        | 247        |  |
|                | Abexinostat  | 21                                  | 63       | 148  | 370        | 60         | 48         | 350        | 168       | 12         |  |
|                | Givinostat   | 133                                 | 293      | 136  | 837        | >100<br>0  | 532        | 524        | 512       | 312        |  |
| <b>Non-hit</b> | Ricolinostat | 58                                  | 48       | 51   | 100        | >100<br>0  | >100<br>0  | >100<br>0  | >100<br>0 | 5          |  |
|                | Citarinostat | 35                                  | 45       | 46   | 137        | >100<br>0  | >100<br>0  | >100<br>0  | >100<br>0 | 3          |  |
|                | Mocetinostat | 200                                 | 300      | 1700 | >100<br>00 | >100<br>00 | >100<br>00 | >100<br>00 |           | >100<br>00 |  |
|                | Entinostat   | 200                                 | 120<br>0 | 2300 | >100<br>00 | >100<br>00 |            | >100<br>00 | 500       | >100<br>00 |  |
|                | Romidepsin   | 1                                   | 1        | 1    | >100<br>0  | 647        | >100<br>0  | >100<br>0  | >100<br>0 | 226        |  |

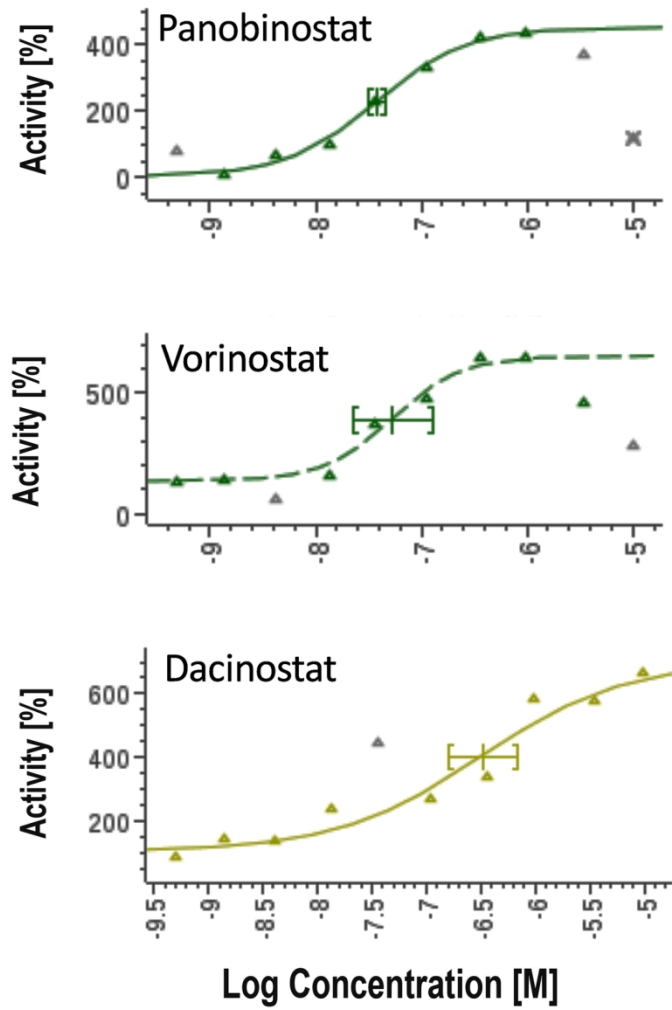

Supplementary Figure 1. Dose response analysis of selected HDACi in counter-screen.

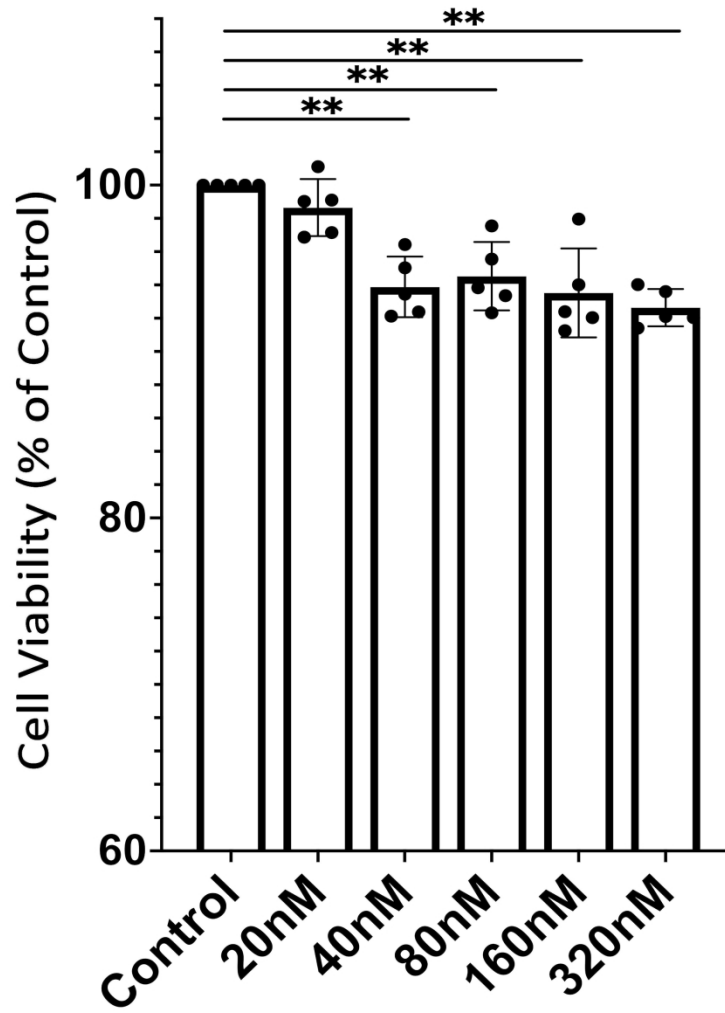

Supplementary Figure 2. Cell viability of chondrocytes after treatment with Panobinostat.

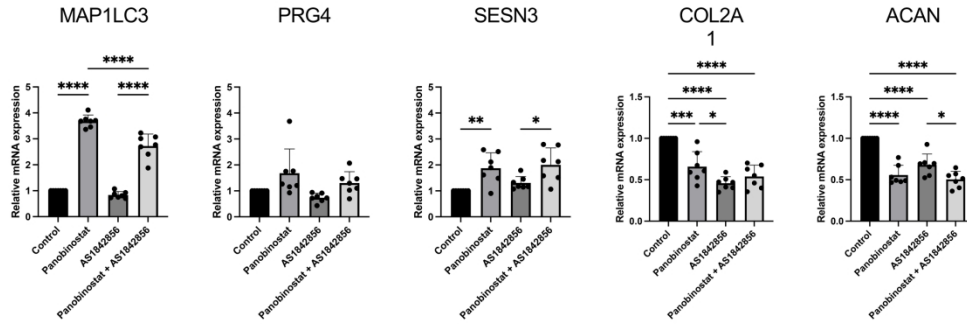

**Supplementary Figure 3.** Effects of FOXO1 inhibition on Panobinostat treatment. Human normal healthy chondrocytes (passage 1 from 7 donors) were incubated with Panobinostat (80 nM) in the presence or absence of the specific FOXO1 inhibitor AS1842856 (0.1  $\mu$ M) for 24 hours and RNA was isolated for qRT-PCR analysis. \*\*\*\*=  $p < 0.0001$ ; \*\*\*=  $p < 0.001$ ; \*\*=  $p < 0.01$ ; \*=  $p < 0.05$ .

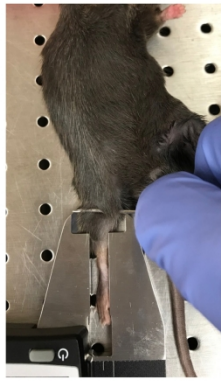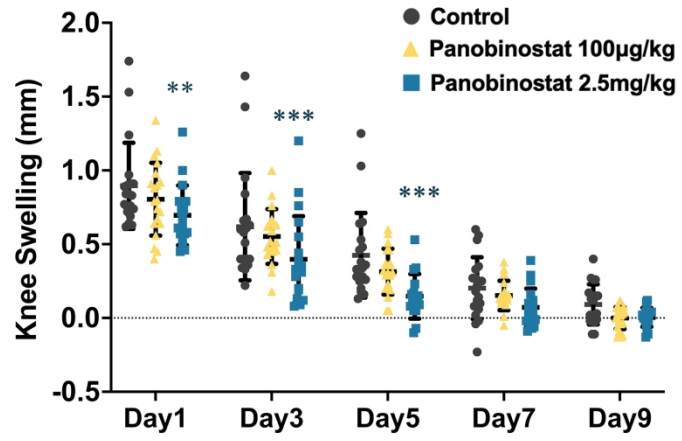

Supplementary Figure 4. Knee swelling of mice that were subjected to DMM.

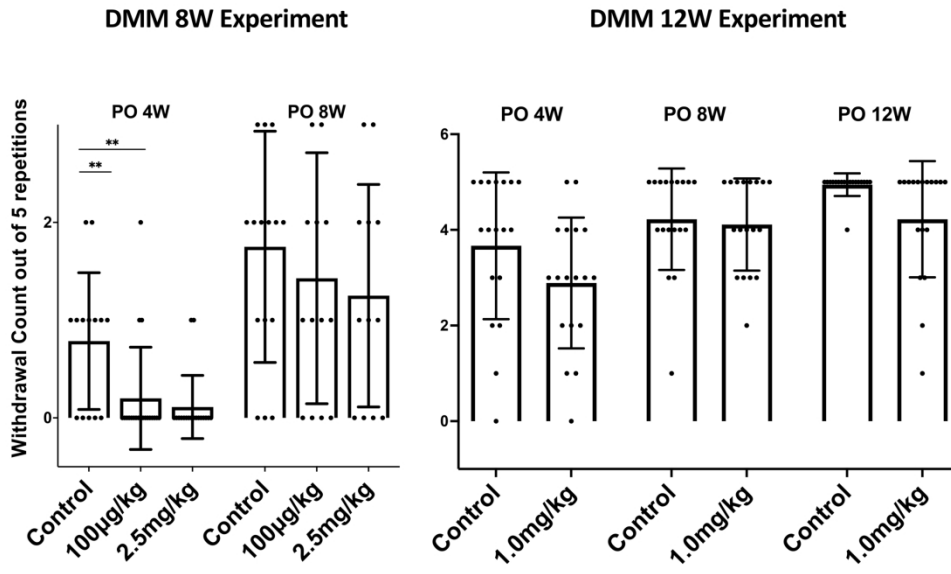

Supplementary Figure 5. Von Frey testing for evaluating mechanical allodynia was performed with 2 g filaments at the indicated time points after DMM in the 8-week and 12-week Panobinostat treatment experiments.

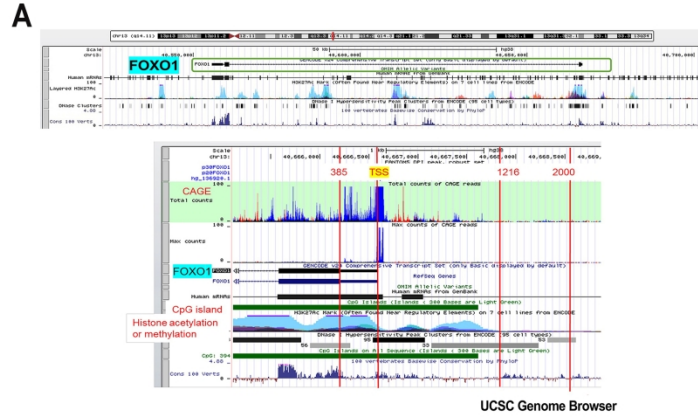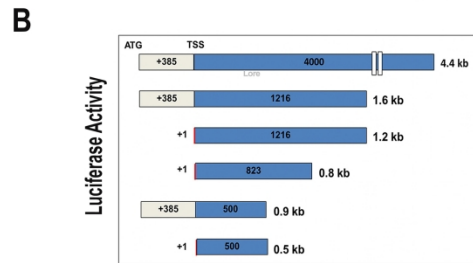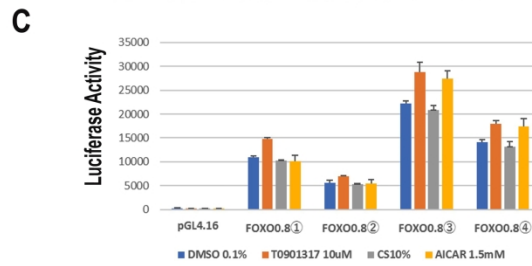

Supplementary Figure 6. FoxO1 reporter constructs. (A) FoxO1 promoter. (B) Various FoxO1 promoter sequences ranging from 0.5 kb to 4.4 kb were inserted to pGL4.16 [Luc2CP/Hygro] plasmid (Promega) which encodes the luciferase reporter gene luc2CP.
